# Supplementary material for: Advancing Crop Modeling and Data Assimilation Using AquaCrop v7.2 in NASA's Land Information System Framework v7.5
Source: Copernicus journal article supplement (doi:10.5194/egusphere-2025-4417), 2025-10-06

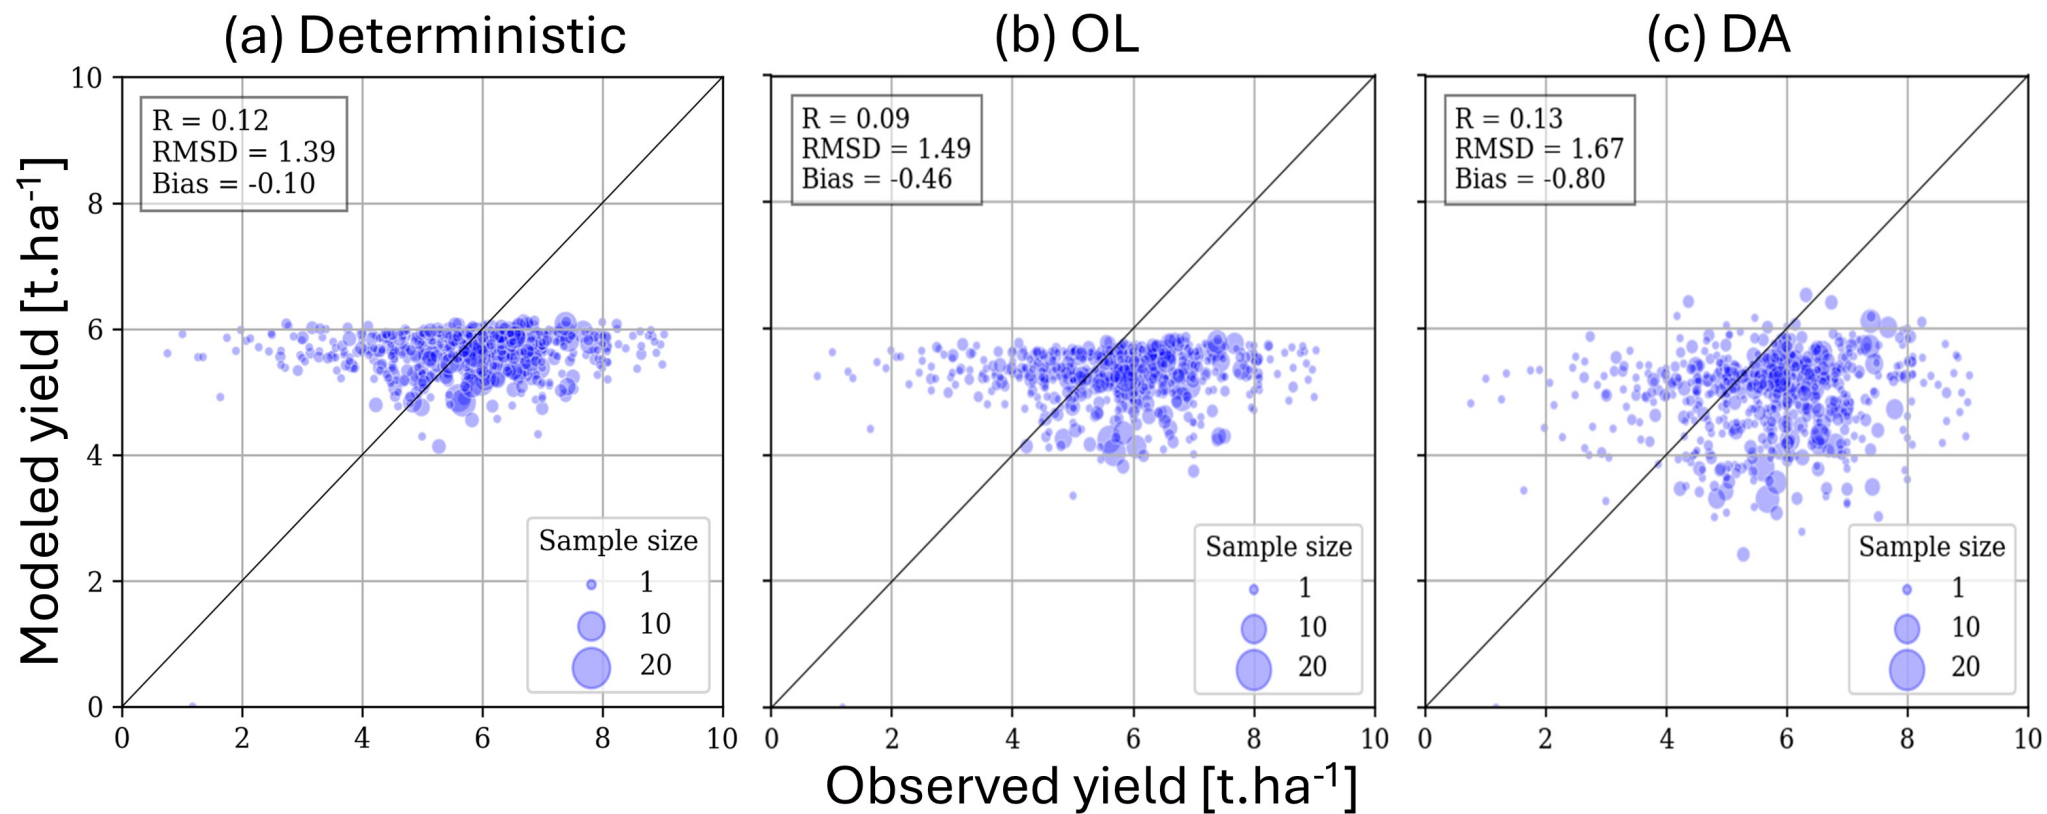

Supplement: Supplementary file [file egusphere-2025-4417-AC1-supplement.pdf]
